# Supplementary material for: Patient-oriented gene set analysis for cancer mutation data
Source: PubMed Central journal article supplement (PMC3156951; doi:10.1186/gb-2010-11-11-r112), 2010-11-23
Supplement: gb-2010-11-11-r112-S1.pdf [file gb-2010-11-11-r112-S1.pdf]

## Appendix

### Notation

The notation used in summarized in Table 1.

Table 1: Notation.

|                |                                                                                                                                                                                                         |                                                                                                                                                                                                     |
|----------------|---------------------------------------------------------------------------------------------------------------------------------------------------------------------------------------------------------|-----------------------------------------------------------------------------------------------------------------------------------------------------------------------------------------------------|
| Indexes        | $i = 1, \dots, I$<br>$g = 1, \dots, G$<br>$s = 1, \dots, S$                                                                                                                                             | index over samples<br>index over genes<br>index over gene sets                                                                                                                                      |
| Sample level   | $N_i$<br>$\mathbf{N} = [\mathbf{N}_i]_{1 \leq i \leq I}$                                                                                                                                                | number of events in sample $i$                                                                                                                                                                      |
| Gene level     | $X_{gi}$<br>$\mathbf{X} = [\mathbf{X}_{gi}]_{1 \leq g \leq G, 1 \leq i \leq I}$<br>$p_{gi}$<br>$\mathbf{p} = [\mathbf{p}_{gi}]_{1 \leq g \leq G, 1 \leq i \leq I}$                                      | a statistic for gene $g$ in sample $i$ (binary)<br>probability of gene $g$ being altered in sample $i$ if gene $g$ were a passenger gene (also called <i>passenger probability</i> )                |
| gene set level | $m_{gs}$<br>$m_{+s} = \sum_{g=1}^G m_{gs}$<br>$\mathbf{M} = [\mathbf{m}_{gs}]_{1 \leq g \leq G, 1 \leq s \leq S}$<br>$Z_{si} = 1 - \prod_{m_{gs}=1} (1 - X_{gi})$<br>$T_s = \sum_{i=1}^I a_{si} Z_{si}$ | indicator of whether gene $g$ is in gene set $s$<br>number of genes in gene set $s$<br>score for gene set $s$ in sample $i$<br>score for gene set $s$ (where $a_{si}$ are known positive constants) |

We consider  $X_{gi}$ ,  $N_i$ ,  $\mathbf{N}$ ,  $\mathbf{T}_s$  and  $Z_{si}$  to be random variables, and denote their observed values by  $x_{gi}$ ,  $n_i$ ,  $\mathbf{n}$ ,  $\mathbf{t}_s$  and  $z_{si}$ , respectively. We assume that all the  $I$  samples are independent of each other. We also assume that all the  $G$  genes are independent of each other.

### Preliminaries

**Result** We note that we can calculate both  $E(T_s)$  and  $Cov(T_{s1}, T_{s2})$  in terms of the means of  $X_{gi}$ .

*Proof.* We primarily use the assumption of independence of genes and samples.

$$\begin{aligned}
 E(Z_{si}) &= E\left\{1 - \prod_{m_{gs}=1} (1 - X_{gi})\right\} = 1 - \prod_{m_{gs}=1} \{1 - E(X_{gi})\} \\
 \Rightarrow E(T_s) &= \sum_{i=1}^I a_{si} E(Z_{si}) = \sum_{i=1}^I a_{si} - \sum_{i=1}^I a_{si} \prod_{m_{gs}=1} \{1 - E(X_{gi})\}
 \end{aligned}$$

Denote the intersection of the gene sets  $s_1$  and  $s_2$  by  $r$ . Denote by  $c_1$  the difference between  $s_1$  and  $r$  and

by  $c_2$  the difference between  $s_2$  and  $r$ .

$$\begin{aligned}
Z_{s_1,i}Z_{s_2,i} &= \left\{1 - \prod_{m_{gs_1}=1} (1 - X_{gi})\right\} \left\{1 - \prod_{m_{gs_2}=1} (1 - X_{gi})\right\} \\
&= \left\{1 - \prod_{m_{gr}=1} (1 - X_{gi}) \prod_{m_{gc_1}=1} (1 - X_{gi})\right\} \left\{1 - \prod_{m_{gr}=1} (1 - X_{gi}) \prod_{m_{gc_2}=1} (1 - X_{gi})\right\} \\
&= 1 - \prod_{m_{gs_1}=1} (1 - X_{gi}) - \prod_{m_{gs_2}=1} (1 - X_{gi}) \\
&\quad + \prod_{m_{gr}=1} (1 - X_{gi})^2 \prod_{m_{gc_1}=1} (1 - X_{gi}) \prod_{m_{gc_2}=1} (1 - X_{gi}) \\
&= 1 - \prod_{m_{gs_1}=1} (1 - X_{gi}) - \prod_{m_{gs_2}=1} (1 - X_{gi}) \\
&\quad + \prod_{m_{gr}=1} (1 - X_{gi}) \prod_{m_{gc_1}=1} (1 - X_{gi}) \prod_{m_{gc_2}=1} (1 - X_{gi}) \\
\Rightarrow E(Z_{s_1,i}Z_{s_2,i}) &= 1 - \prod_{m_{gs_1}=1} \{1 - E(X_{gi})\} - \prod_{m_{gs_2}=1} \{1 - E(X_{gi})\} \\
&\quad + \prod_{m_{gr}=1} \{1 - E(X_{gi})\} \prod_{m_{gc_1}=1} \{1 - E(X_{gi})\} \prod_{m_{gc_2}=1} \{1 - E(X_{gi})\} \\
E(Z_{s_1,i})E(Z_{s_2,i}) &= \left\{1 - \prod_{m_{gs_1}=1} \{1 - E(X_{gi})\}\right\} \left\{1 - \prod_{m_{gs_2}=1} \{1 - E(X_{gi})\}\right\} \\
&= 1 - \prod_{m_{gs_1}=1} \{1 - E(X_{gi})\} - \prod_{m_{gs_2}=1} \{1 - E(X_{gi})\} \\
&\quad + \prod_{m_{gr}=1} \{1 - E(X_{gi})\}^2 \prod_{m_{gc_1}=1} \{1 - E(X_{gi})\} \prod_{m_{gc_2}=1} \{1 - E(X_{gi})\} \\
\Rightarrow Cov(Z_{s_1,i}, Z_{s_2,i}) &= E\{Z_{s_1,i}Z_{s_2,i}\} - E\{Z_{s_1,i}\}E\{Z_{s_2,i}\} \\
&= \left\{1 - \prod_{m_{gr}=1} \{1 - E(X_{gi})\}\right\} \\
&\quad - \prod_{m_{gr}=1} \{1 - E(X_{gi})\} \prod_{m_{gc_1}=1} \{1 - E(X_{gi})\} \prod_{m_{gc_2}=1} \{1 - E(X_{gi})\} \\
\Rightarrow Cov(T_{s_1}, T_{s_2}) &= \sum_{i=1}^I a_{s_1,i} a_{s_2,i} Cov(Z_{s_1,i}, Z_{s_2,i})
\end{aligned}$$

□

In particular, we note that  $Cov(Z_{s_1,i}, Z_{s_2,i}) \geq 0$ , so  $Cov(T_{s_1}, T_{s_2}) \geq 0$ .

### Binary Gene Statistic

The scenario we consider is where:

$$X_{gi} = \begin{cases} 1 & \text{if gene } g \text{ is altered in sample } i \\ 0 & \text{if gene } g \text{ is not altered in sample } i \end{cases}$$

Given that we are considering somatic mutations, we note that it is extremely rare to have more than one event per gene, so this definition is nearly equivalent to:

$$X_{gi} = \begin{cases} 1 & \text{if gene } g \text{ has one event in sample } i \\ 0 & \text{else} \end{cases}$$

We note that in this case,  $Z_{si}$  is an indicator of whether gene set  $s$  is altered in sample  $i$ . Thus, by definition, both  $X_{gi}$  and  $Z_{si}$  are Bernoulli random variables.

We denote the null hypothesis for gene set  $s$  by  $H_{s0}$ , and the distributions of  $Z_{si}$  and  $T_s$  under the null by  $Z_{si}^0$  and  $T_s^0$ . We note that there are a number of null hypotheses to choose from. We consider the “permutation” null and the “passenger rate” null, defined below.

#### *Statement of Permutation Null*

$H_{s0}$  : The probability distribution of the number of samples gene set  $s$  is mutated in ( $T_s$ ) is the same as it would be if we randomly chose  $I$  samples which had the same number of events as the samples under consideration ( $N_i = n_i$  for  $i = 1, \dots, I$ , or, equivalently,  $\mathbf{N} = \mathbf{n}$ ), i.e., if we permuted the number of events within samples.

We take the “repeated draws of the  $I$  random samples” to be permutations of the events in the existing samples among the  $G$  genes. Since we assume that each gene can have at most one event per tumor sample, to get  $T_s^0$ , we choose  $n_i$  genes out of  $G$  genes to have 1 event each, for each of the  $I$  tumor samples.

#### *Statement of Passenger Rate Null*

$H_{s0}$  : The probability distribution of the number of samples gene set  $s$  is mutated in ( $T_s$ ) is the same as it would be if we randomly chose  $I$  samples which had the same passenger mutation rates as the samples under consideration.

#### *Results under Permutation Null*

We assume that under the permutation null, every gene has at most one mutational event per sample.

**Theorem**  $Z_{si}^0 \sim \text{Bernoulli}(q_{si})$ , where  $q_{si} = 1 - \frac{\binom{G-n_i}{m_{+s}}}{\binom{G}{m_{+s}}}$ .

*Proof.* We get:

$$\begin{aligned} q_{si} &= E(Z_{si}^0) = P(Z_{si}^0 = 1) = 1 - P(Z_{si}^0 = 0) = 1 - P(\text{gene set } s \text{ is not altered in sample } i | \text{sample } i \text{ has } n_i \text{ events}) \\ &= 1 - P(\text{select } m_{+s} \text{ genes with 0 events in sample } i \text{ out of } G \text{ genes} \mid \text{sample } i \text{ has } n_i \text{ events}) \\ &= 1 - \frac{\binom{n_i}{0} \binom{G-n_i}{m_{+s}-0}}{\binom{G}{m_{+s}}} = 1 - \frac{\binom{G-n_i}{m_{+s}}}{\binom{G}{m_{+s}}} \end{aligned}$$

□

**Note** We can also use approximations of the hypergeometric distribution, such as  $1 - \left\{ \frac{G-n_i}{G} \right\}^{m_{+s}}$  or  $1 - \left\{ \frac{G-m_{+s}}{G} \right\}^{n_i}$ , given that both  $m_{+s}$  and  $n_i$  are generally much smaller than  $G$ . The results will be nearly identical in all of the three cases.

**Corollary** Under the assumptions that under the permutation null, every gene has at most one mutational event and that all the events are independent of each other,  $T_s^0$  is a weighted sum of independent Bernoulli random variables. We give exact results for  $E(T_s^0)$ ,  $Cov(T_{s_1}^0, T_{s_2}^0)$ , and  $Var(T_s^0)$ .

*Proof.* Using the theorem above,  $Z_{si}^0$  are independent Bernoulli random variables.

$$\begin{aligned}
E(T_s^0) &= \sum_{i=1}^I a_{si} Z_{si}^0 = \sum_{i=1}^I a_{si} - \sum_{i=1}^I a_{si} \frac{\binom{G-n_i}{m+s}}{\binom{G}{m+s}} \\
Cov(Z_{s_1,i}^0, Z_{s_2,i}^0) &= \left\{ 1 - \prod_{m_{gr}=1} \{1 - E(X_{gi}|N_i = n_i)\} \right\} \\
&\quad \prod_{m_{gr}=1} \{1 - E(X_{gi}|N_i = n_i)\} \\
&\quad \prod_{m_{gc_1}=1} \{1 - E(X_{gi}|N_i = n_i)\} \prod_{m_{gc_2}=1} \{1 - E(X_{gi}|N_i = n_i)\} \\
&= \left\{ 1 - \frac{\binom{G-n_i}{m+r}}{\binom{G}{m+r}} \right\} \left\{ \frac{\binom{G-n_i}{m+s_1+m+s_2-m+r}}{\binom{G}{m+s_1+m+s_2-m+r}} \right\} \\
&= \frac{\binom{G-n_i}{m+s_1+m+s_2-m+r}}{\binom{G}{m+s_1+m+s_2-m+r}} - \frac{\binom{G-n_i}{m+r}}{\binom{G}{m+r}} \frac{\binom{G-n_i}{m+s_1+m+s_2-m+r}}{\binom{G}{m+s_1+m+s_2-m+r}} \\
\Rightarrow Cov(T_{s_1}^0, T_{s_2}^0) &= \sum_{i=1}^I a_{s_1,i} a_{s_2,i} Cov(Z_{s_1,i}^0, Z_{s_2,i}^0) \\
&= \sum_{i=1}^I a_{s_1,i} a_{s_2,i} \frac{\binom{G-n_i}{m+s_1+m+s_2-m+r}}{\binom{G}{m+s_1+m+s_2-m+r}} \\
&\quad - \sum_{i=1}^I a_{s_1,i} a_{s_2,i} \frac{\binom{G-n_i}{m+r}}{\binom{G}{m+r}} \frac{\binom{G-n_i}{m+s_1+m+s_2-m+r}}{\binom{G}{m+s_1+m+s_2-m+r}}
\end{aligned}$$

In particular:

$$Var(T_s^0) = \sum_{i=1}^I a_{si}^2 \frac{\binom{G-n_i}{m+s}}{\binom{G}{m+s}} - \sum_{i=1}^I a_{si}^2 \left[ \frac{\binom{G-n_i}{m+s}}{\binom{G}{m+s}} \right]^2$$

□

### Results under Passenger Rate Null

**Theorem**  $Z_{si}^0 \sim \text{Bernoulli}(q_{si})$ , where:

$$q_{si} = 1 - \prod_{m_{gs}=1} (1 - p_{gi}).$$

*Proof.*

$$\begin{aligned}
q_{si} &= E(Z_{si}^0) \\
&= 1 - \prod_{m_{gs}=1} \{1 - P(X_{gi} = 1|\mathbf{p})\} \\
&= 1 - \prod_{m_{gs}=1} (1 - p_{gi})
\end{aligned}$$

□

**Corollary** We can similarly derive exact results for  $E(T_s^0)$ ,  $Cov(T_{s1}^0, T_{s2}^0)$ , and  $Var(T_s^0)$  in this case.

### Calculation of P-values

For the case where  $a_{si} = 1$  for all  $1 \leq i \leq I; 1 \leq s \leq S$ , we use the algorithm described in [24] to calculate the p-values. For the case where  $a_{si} = 1$  does not always hold, we provide the theorem below.

**Theorem** We provide a recursive method for calculating the cdf of  $T_s^0$ .

*Proof.* We model this proof on the proof in Section 1.7 of [25].

We define the following random variables and consider their cdfs:

$$\begin{aligned} T_s^{0,j} &= \sum_{i=1}^j a_{si} Z_{si}^0 \text{ for } 1 \leq j \leq I, \\ F_s^{0,j}(x) &:= Pr(T_s^{0,j} \leq x). \end{aligned}$$

We can calculate  $F_s^{0,j}$  recursively, beginning with  $j = 1$ :

$$\begin{aligned} F_s^{0,1}(x) &= 0 \text{ for } x < 0, \\ F_s^{0,1}(x) &= Pr(a_{s1} Z_{s1}^0 \leq x) = Pr(Z_{s1} = 0) = 1 - q_{s1} \text{ for } 0 \leq x < a_{s1}, \\ F_s^{0,1}(x) &= Pr(a_{s1} Z_{s1}^0 \leq x) = Pr(Z_{s1} = 0 \text{ or } Z_{s2} = 1) = 1 \text{ for } x \geq a_{s1}, \end{aligned}$$

since  $a_{si} > 0$  for all  $1 \leq i \leq I$ .

For  $j > 1$ ,  $F_s^{0,j}$  can easily be calculated in terms of  $F_s^{0,j-1}$ :

$$\begin{aligned} F_s^{0,j}(x) &= Pr\left(\sum_{i=1}^j a_{si} Z_{si} \leq x\right) \\ &= Pr\left(\sum_{i=1}^j a_{si} Z_{si} \leq x \mid Z_{sj} = 1\right)P(Z_{sj} = 1) + Pr\left(\sum_{i=1}^j a_{si} Z_{si} \leq x \mid Z_{sj} = 0\right)P(Z_{sj} = 0) \\ &= Pr\left(\sum_{i=1}^j a_{si} Z_{si} \leq x - a_{sj}\right)P(Z_{sj} = 1) + Pr\left(\sum_{i=1}^j a_{si} Z_{si} \leq x\right)P(Z_{sj} = 0) \\ &= q_{sj} F_s^{0,j-1}(x - a_{sj}) + (1 - q_{sj}) F_s^{0,j-1}(x) \end{aligned}$$

In particular, for  $j = I$ ,  $F_s^{0,I}$  is the cdf of  $T_s^0$ . □

**Corollary** We can use the theorem above to calculate the p-value, which is equal to  $P(T_s^0 \geq t_s)$ , where  $t_s$  is the observed value of  $T_s$ , since  $P(T_s^0 \geq t_s) = 1 - P(T_s^0 < t_s) = 1 - F_s^{0,I}(t_s -)$ .

### Tumor Heterogeneity

One may choose whether or not to incorporate tumor heterogeneity into the analysis. This can be reflected in the sample-specific constants  $a_{si}$ . If no tumor heterogeneity is assumed, then  $a_{si} = 1$ . If tumor heterogeneity is incorporated, a variety of options are available. We take  $a_{si} = \frac{1}{q_{si}}$  in this case, so that, for each gene set, tumors which have a higher probability of being altered in the respective set under the null, get down-weighted. Thus, we consider 4 different methods: *permutation null without heterogeneity*, *permutation null with heterogeneity*, *passenger null without heterogeneity*, and *passenger null with heterogeneity*.
