# Supplementary material for: Patient-oriented gene set analysis for cancer mutation data
Source: PubMed Central journal article supplement (PMC3156951; doi:10.1186/gb-2010-11-11-r112), 2010-11-23

Comparison of the main patient-oriented methods (passenger null without heterogeneity) to the gene-oriented method on the dataset in [4]. The points in blue are gene sets which include genes in the *PI3K* pathway and the points in orange are gene sets which include genes in the *RB1* pathway. The vertical and horizontal lines are drawn at q-values of 0.1.

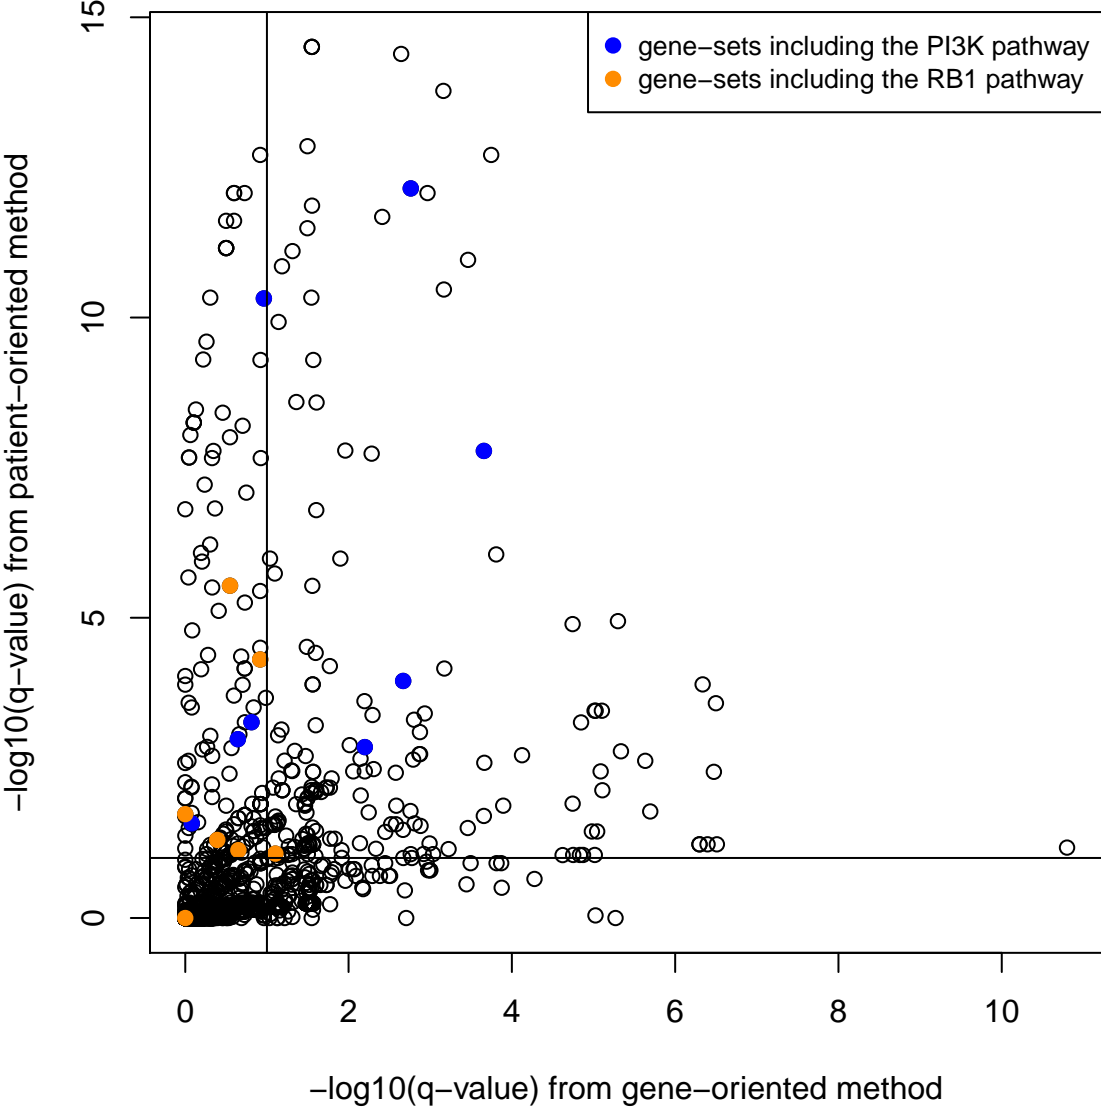

Supplement: gb-2010-11-11-r112-S3.pdf [file gb-2010-11-11-r112-S3.pdf]
